# Supplementary material for: A facile synthesis of high quality nanostructured CeO2 and Gd2O3-doped CeO2 solid electrolytes for improved electrochemical performance
Source: Royal Society of Chemistry journal article supplement (doi:10.1039/c5cp00735f), 2015-01-01
Supplement: c5cp00735f1.pdf [file c5cp00735f1.pdf]

## Supplementary Information

Facile synthesis of high quality nanostructured CeO<sub>2</sub> and Gd<sub>2</sub>O<sub>3</sub>-doped CeO<sub>2</sub>  
solid electrolyte for improved electrochemical performance

Yu-Lin Kuo<sup>a,\*</sup>, Yu-Ming Su<sup>a</sup>, Hung-Lung Chou<sup>b</sup>

<sup>a</sup> *Department of Mechanical Engineering, National Taiwan University of Science and Technology, 43, Section 4, Keelung Road, Taipei, 10607, Taiwan*

<sup>b</sup> *Graduate Institute of Applied Science and Technology, National Taiwan University of Science and Technology, 43, Section 4, Keelung Road, Taipei, 10607, Taiwan*

\*Correspondence to Y. L. Kuo [ylkuo@mail.ntust.edu.tw].

## Supplementary Figures

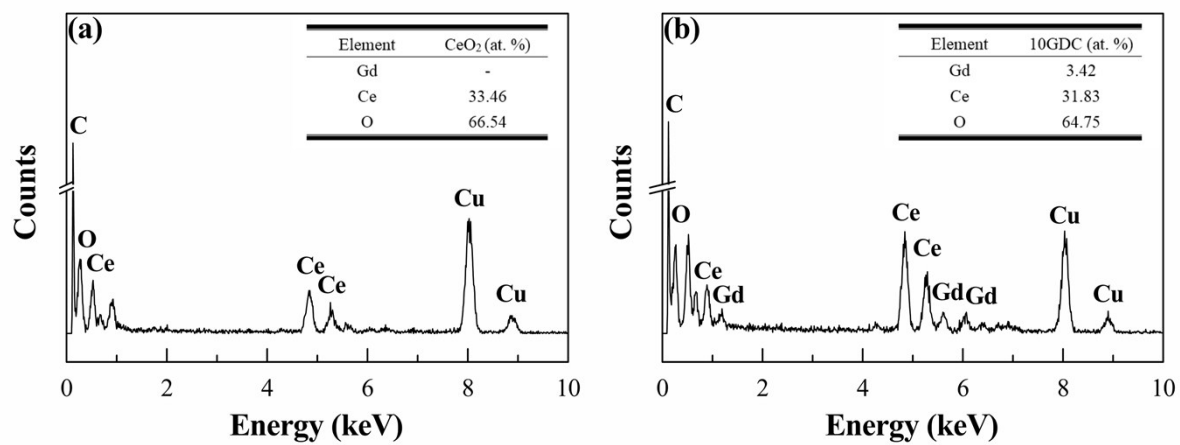

Supplementary Fig. S1.

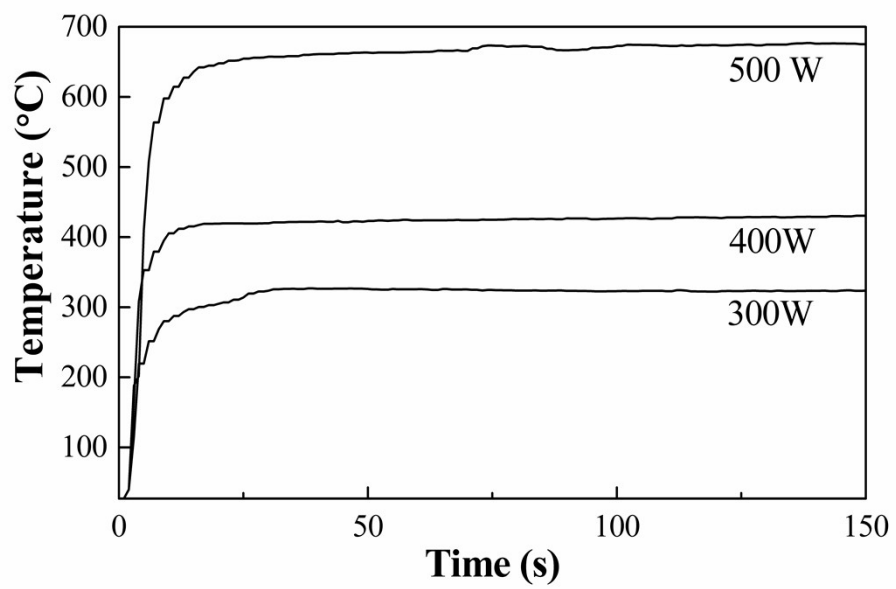

Supplementary Fig. S2

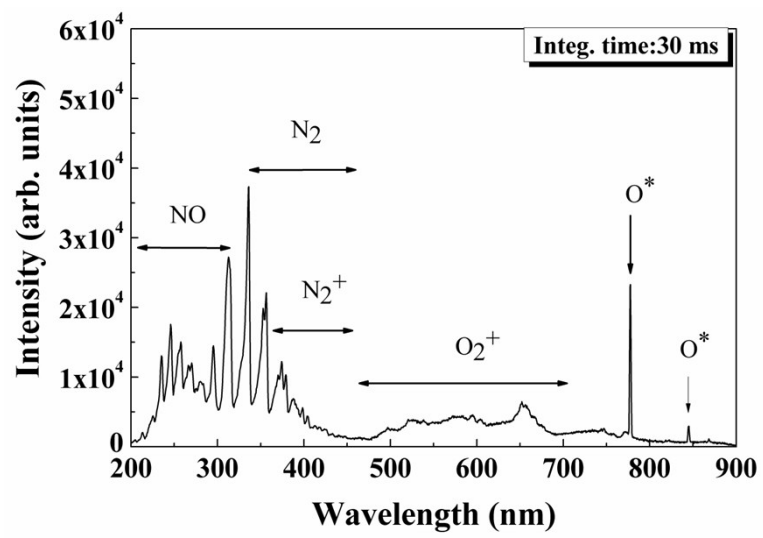

Supplementary Fig. S3
